# Supplementary material for: Loss of Non-Apoptotic Role of Caspase-3 in the PINK1 Mouse Model of Parkinson’s Disease
Source: MDPI journal article supplement (doi:10.3390/ijms20143407), 2019-07-11
Supplement: s1 [file s1]

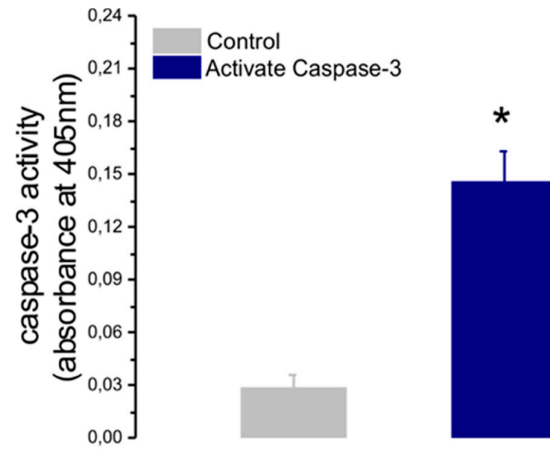

**Figure S1.** Caspase-3 activation was measured using colorimetric kit. Wild type slices were incubated with high doses of PETCM (100  $\mu$ M, for 1h, 37  $^{\circ}$ C; navy column), and compared them with naïve samples (untreated slices; grey column). PETCM was able to induce a drastic increase in caspase-3 activity (naïve absorbance =  $0.0285 \pm 0.0077$ ,  $n = 3$ ; PETCM absorbance =  $0.14550 \pm 0.01768$ ;  $n = 3$ ;  $p < 0.05$   $T$ -test).
